Energy Crisis in Human and Mouse Models of *SLC4A11*-associated Corneal Endothelial Dystrophies

Running Title: Energy Crisis in SLC4A11-deficient Corneal Endothelium

Wenlin Zhang<sup>1</sup>, Ricardo Frausto<sup>1</sup>, Doug Chung<sup>1</sup>, Christopher G. Griffis<sup>1</sup>, Liyo Kao<sup>2</sup>, Angela Chen<sup>1</sup>, Rustam Azimov<sup>2</sup>, Alapakkam Sampath<sup>1</sup>, Ira Kurtz<sup>2,3</sup>, Anthony Aldave<sup>1\*</sup>

<sup>1</sup>Stein Eye Institute, UCLA, Los Angeles, CA 90095

<sup>2</sup>Division of Nephrology, David Geffen School of Medicine at UCLA, Los Angeles, CA 90095

<sup>3</sup>Brain Research Institute, UCLA, Los Angeles, CA 90095

\*Corresponding Author: Anthony Aldave, [aldave@jsei.ucla.edu](mailto:aldave@jsei.ucla.edu)

Conflict of Interests: There is no conflict of interests.

## Abstract

Mutations in the solute-linked carrier family 4 member 11 (*SLC4A11*) gene are associated with congenital hereditary endothelial dystrophy (CHED), Fuchs endothelial corneal dystrophy and Harboyan syndrome, in all of which visually significant cornea edema may require corneal transplantation. However, the pathogenesis of SLC4A11-associated corneal endothelial dystrophies remains to be elucidated. Recent evidence suggested cellular respiration reprogramming and mitochondrial oxidative stress in SLC4A11-deficient corneal endothelium. Given the complexity of cellular metabolic regulation and its cell type specific impact on cellular physiology, we systemically analyzed the transcriptome of *SLC4A11* knock-down primary human corneal endothelium (*SLC4A11* KD pHCEnC) and corneal endothelial cells derived from *Slc4a11*<sup>-/-</sup> mice (*Slc4a11*<sup>-/-</sup> MCEnC) to provide a comprehensive characterization of the transcriptome profile changes resulting from loss of SLC4A11. To identify the conserved molecular mechanisms that lead to cornea endothelial dysfunction in both the human and murine models, we performed comparative transcriptomic analysis. Our analysis identified inhibition of cell metabolism and ion transport function as well as mitochondria dysfunction as shared between *SLC4A11* KD pHCEnC and *Slc4a11*<sup>-/-</sup> MCEnC. Functional analysis confirmed the absence of SLC4A11-mediated NH<sub>4</sub>Cl-induced membrane depolarization in *Slc4a11*<sup>-/-</sup> MCEnC. Transcriptome of *SLC4A11* KD pHCEnC and *Slc4a11*<sup>-/-</sup> MCEnC identified downregulation of Na<sup>+</sup>-HCO<sub>3</sub><sup>-</sup> transporter (NBCe1, *SLC4A4*), a key player in corneal endothelial 'pump' function, and upregulation of Syntaxin 17 (*STX17*), an initiator of mitophagy. NBCe1 and STX17 were further analyzed in *Slc4a11*<sup>-/-</sup> MCEnC for functional impact and in *SLC4A11* KD pHCEnC and corneal endothelium from individuals with CHED for protein expression, all

showed consistent changes with transcriptome. CHED corneal endothelium also showed decreased immunostaining intensity for mitochondria markers suggesting decreased mitochondria density. In *SLC4A11* KD pHCEnC and *Slc4a11*<sup>-/-</sup> MCEnC, steady state ATP depletion and ATP sensing AMPK-p53 pathway activation were observed, consistent with the prediction using transcriptome data that transcriptional factor p53 were responsible for the transcriptomic changes. These findings suggest that insufficient energy fueling the corneal endothelial 'pump', as a result of metabolic inhibition and failing mitochondria, is the direct cause of clinical phenotype of corneal edema in *SLC4A11*-associated corneal endothelial dystrophies.

Key Words:

Congenital Hereditary Endothelial Dystrophy

Fuchs Endothelial Corneal Dystrophy

Harboyan Syndrome

SLC4A11

AMPK

P53

Mitochondria dysfunction

1 **INTRODUCTION**

2 Solute-linked carrier family 4 member 11 (SLC4A11) is one of the highly expressed  
3 differentiation markers for corneal endothelium [1-3]. Mutations in *SLC4A11* are  
4 associated with congenital hereditary endothelial dystrophy (CHED), Harboyan  
5 syndrome (CHED with perceptive deafness) and Fuchs endothelial corneal  
6 dystrophy (FECD) [4-7]. Additional evidence of a role for *SLC4A11* in FECD comes  
7 from reports of the hypermethylation of the *SLC4A11* promoter and transcriptional  
8 downregulation of *SLC4A11* in FECD corneal endothelium [8,9]. Children with  
9 CHED often present with bilateral corneal edema at or shortly after birth with  
10 significant vision impairment. Corneal transplantation is the only means of restoring  
11 vision and is associated with a guarded prognosis in terms of long term recovery of  
12 vision and graft survival [10]. In addition, these children are at risk of developing  
13 perceptive deafness later in life (Harboyan Syndrome) [11]. FECD affects as much  
14 as 5% of the U.S. population over 40 years of age [12], and visually significant  
15 corneal edema secondary to FECD is the most common indication for keratoplasty in  
16 US and worldwide [13,14]. Together, CHED and FECD constitute common  
17 indications for corneal transplantation in published series from around the world  
18 [15,16].

19 SLC4A11 is functionally characterized as an NH<sub>3</sub> and alkaline pH stimulated  
20 H<sup>+</sup> transporter, while permeability to Na<sup>+</sup>, OH<sup>-</sup> and water has also been reported [17-  
21 21]. SLC4A11 is essential in facilitating energy producing glutaminolysis, maintaining  
22 antioxidant signaling and preventing apoptosis in corneal endothelial cell [22-25].  
23 During development and in the event of oxidative DNA damage, SLC4A11 gene  
24 expression is directly upregulated by activated p53 during development and in the  
25 response to DNA damage [26,27]. In SLC4A11-associated corneal endothelial

26 dystrophies, the cornea edema that develops as a result of pathologic *SLC4A11*  
27 mutations is evidence of corneal endothelial dysfunction, either from direct cell  
28 loss/death or from disturbances in the corneal endothelial 'pump-leak' system [28-30].  
29 Corneal endothelial 'pump-leak' system achieves corneal transparency by  
30 maintaining the dynamic balance between the passive fluid leak from anterior  
31 chamber into corneal stroma and the active pump moving fluid from corneal stroma  
32 to anterior chamber. The fluid leak in corneal endothelium is particularly significant  
33 because hydrophilic glycosaminoglycans in the stroma are only 13~23% hydrated in  
34 physiological condition, producing a significant swelling pressure [31-33]. In addition,  
35 corneal endothelial tight junctions are focally incomplete, leading to a  
36 nonhomogeneous seal of the lateral intercellular space and offering little resistance  
37 to the paracellular passage of water and solutes [34-36]. The fluid pump activity is  
38 associated with a host of ion channels/exchangers/pumps positioned strategically at  
39 the apical and basolateral membranes of the corneal endothelial cells [29,37] and  
40 driven by an ionic electrical-chemical gradient set up by the highly expressed  $\text{Na}^+/\text{K}^+$ -  
41 ATPase [38]. As such, corneal endothelium has the second highest density of  
42 mitochondria among any cell types in the body (second to photoreceptors) to  
43 generate sufficient ATP to fuel the  $\text{Na}^+/\text{K}^+$ -ATPase driven endothelial 'pump'. As  
44 mentioned above, SLC4A11 plays a significant role in facilitating ATP-generating  
45 glutaminolysis in corneal endothelium [24]. Thus, it is not surprising that  
46 glutaminolysis inhibition, mitochondria membrane potential (MMP) depolarization,  
47 enriched mitochondrial reactive oxidative species (ROS) and increased mitochondria  
48 turnover have been observed in the corneal endothelium of the *Slc4a11*<sup>-/-</sup> mouse  
49 [24,25,39], which recapitulates the CHED corneal phenotype of significant cornea  
50 edema, Descemet membrane thickening and progressive corneal endothelial cell

51 loss [40]. Thus, the association between SLC4A11 and corneal endothelial  
52 mitochondrial function suggests SLC4A11 is involved not only in moving ions across  
53 the plasma membrane but also in the supply of energy to the endothelial 'pump'.

54       Approximately 94 mutations, including nonsense, missense, frameshift and  
55 intronic mutations, have been identified in *SLC4A11* in individuals with CHED  
56 [4,6,11,41-58]. Coding region mutations have been identified in 17 of the 19 exons of  
57 *SLC4A11*, with no spatial clustering within ~~to any of the xx functional domains of~~  
58 SLC4A11 protein. While a large number of these mutations result in SLC4A11  
59 protein misfolding and failure to mature to the plasma membrane [5,6,59-61], some  
60 mutations affect SLC4A11 transporter function without impacting membrane  
61 trafficking [19,62,63] or cause aberrant *SLC4A11* pre-mRNA splicing and  
62 subsequent reduced SLC4A11 expression [57]. Collectively, these observations  
63 suggest that loss of SLC4A11 function is the primary pathogenetic mechanism in  
64 CHED rather than mutant SLC4A11 protein misfolding/mislocalization in ER and  
65 secondary unfolded protein response. Therefore we investigated the impact of  
66 SLC4A11 reduction on the corneal endothelial transcriptome in human and murine  
67 corneal endothelial cells, with validation in corneal endothelium from individuals with  
68 CHED, and elucidated the upstream molecular mechanism leading to the observed  
69 transcriptomic changes.

70 **MATERIALS AND METHODS**

71 *Isolation and Culturing of Primary Human Corneal Endothelial Cells*

72 Primary cultures of human corneal endothelial cells (pHCEnC) were isolated from  
73 donor corneas as previously described [64]. Cells were plated in laminin coated cell  
74 culture plastic and cultured in a 1:1 mixture of F12-Ham's and M199 (F99) medium.  
75 Experiments were performed when the cells achieved an intact and confluent  
76 monolayer.

77 *Knock-down of SLC4A11 in pHCEnC*

78 Confluent pHCEnC were transfected with 10nM anti-SLC4A11 siRNA (siRNA-  
79 CrCrGrArArGrUrArCrCrUrGrArArGrUrUrArArArGrArACT) or scrambled siRNA  
80 (OriGene Technologies) using Lipofectamine LTX (Life Technologies). At 72 hrs  
81 post-transfection, the cells were lysed in either Tri Reagent (Sigma-Aldrich) or  
82 radioimmunoprecipitation assay (RIPA) buffer for RNA and protein isolation,  
83 respectively.

84 *Immortalized Mouse Corneal Endothelial Cell (MCEnC) Culture*

85 Immortalized *Slc4a11*<sup>+/+</sup> and *Slc4a11*<sup>-/-</sup> MCEnC lines were derived from *Slc4a11*<sup>+/+</sup>  
86 and *Slc4a11*<sup>-/-</sup> mice corneal endothelium respectively as previously described [25].  
87 All MCEnC lines were cultured on flasks coated with a mixture of 40 µg/cm<sup>2</sup>  
88 chondroitin sulfate (Sigma-Aldrich) and 40 ng/ cm<sup>2</sup> laminin (Sigma-Aldrich). Details of  
89 culture medium used can be found in supplemental material.

90 *Total RNA Isolation from pHCEnC and MCEnC*

91 Total RNA from cultured pHCEnC was isolated in TRI Reagent and purified with the  
92 RNeasy Clean-Up Kit (Qiagen). Total RNA from cultured MCEnC was isolated and  
93 purified using the RNeasy Plus Mini Kit (Qiagen). The integrity of the purified RNA



94 was analyzed by the Agilent 2100 Electrophoresis Bioanalyzer System (Agilent  
95 Technologies).

96 *RNA Sequencing (RNA-Seq) of total RNA from pHCEnC and MCEnC*

97 Purified total RNA from pHCEnC was prepared for RNA-seq libraries using KAPA  
98 mRNA HyperPrep Kit. Libraries were sequenced on the Illumina Hi-Seq 4000 and  
99 paired-end 150-bp reads were generated. Purified total RNA from MCEnC was  
100 submitted to the UCLA Technology Center for Genomics & Bioinformatics for library  
101 preparation and sequencing. Single-end 50-bp reads were generated using the  
102 Illumina Hi-seq 3000. The generated FASTQ files and quantitative results are  
103 available from the GEO DataSets database (accession number XXXXX and XXXXX;  
104 NCBI).

105 *RNA-sequencing Data Analyses*

106 The FASTQ files containing the raw reads from the pHCEnC and MCEnC were  
107 aligned to the human (GRCh38/hg38) and mouse (GRCm38/mm10) genomes  
108 respectively using Hisat2. The raw counts of aligned reads were converted to counts  
109 per million (CPM) mapped reads with consideration of library size and normalized by  
110 the method of trimmed mean of M values (TMM). Then linear models for microarray  
111 analysis (LIMMA) coupled with variance modeling at the observation-level (VOOM)  
112 were used for differential gene expression analysis in R software. The following  
113 thresholds defined differential expression: CPM > 1, fold change (fc) > 1, and  
114 adjusted p-value < 0.05. Differential gene expression (DGE) lists were obtained from  
115 the following sample sets respectively: pHCEnC sample set: passage 1 of pHCEnC  
116 with siRNA targeting *SLC4A11* versus scrambled RNA control (*SLC4A11* KD  
117 pHCEnC and scRNA pHCEnC; n=3 each); MCEnC early sample set: early passages  
118 of *Slc4a11*<sup>-/-</sup> MCEnC versus wild-type control (p6 *Slc4a11*<sup>-/-</sup> and p7 *Slc4a11*<sup>+/+</sup>

119 MCEnC; n=4 each); and MCEnC late sample set: late passages of *Slc4a11*<sup>-/-</sup>  
120 MCEnC versus wild-type control (p39 *Slc4a11*<sup>-/-</sup> and p40 *Slc4a11*<sup>+/+</sup> MCEnC; n=4  
121 each).

#### 122 *Ingenuity Pathway Analysis*

123 Ingenuity Pathway Analysis (IPA®, QIAGEN Bioinformatics) was used to perform  
124 comparative transcriptome analysis among three sample sets (pHCEnC, MCEnC  
125 early and MCEnC late), canonical/biological function pathway enrichment and  
126 upstream regulator prediction analyses on each sample set. In the comparative  
127 transcriptome analysis, canonical and biological function pathways with a predicted  
128 activation z-score in each of the three sample sets were sorted by the sign and value  
129 of the z-score to identify the most enriched pathways. Enriched canonical and  
130 biological function pathways without an assigned z-score and predicted upstream  
131 regulators were ranked by mean enrichment p-values among sample sets.

#### 132 *Quantitative PCR*

133 Quantitative PCR was performed to validate the differential expression of selected  
134 genes from transcriptome DGE list on separate batches of RNA samples from  
135 *SLC4A11* KD pHCEnC and *Slc4a11*<sup>-/-</sup> MCEnC. Total RNA of 1 µg from each sample  
136 was reversed transcribed using SuperScript III First-Strand synthesis kit (Sigma).  
137 Quantitative PCR was performed on the LightCycler 480 System (Roche) using the  
138 KAPA SYBR FAST Universal Kit (Kapa Biosystems) with an annealing temperature  
139 of 60 °C. Primers used are listed in Supplemental Table 1. Relative gene expression  
140 was obtained by comparison to the housekeeping gene *PPIA/Ppia* or *ACTB/Actb*  
141 and was calculated by the comparative Ct ( $2^{-\Delta C_t}$ ) method.

#### 142 *Immunofluorescence*

143 Five-micrometer sections of paraffin-embedded corneas from healthy donors and  
144 individuals with CHED were de-paraffinized and re-hydrated in a graded ethanol  
145 series (100%, 95% and 70% and 50%) for 5 min and subject to antigen retrieval in  
146 10 mM Na-citrate. After blocking with 2% bovine serum albumin (BSA) in PBS,  
147 sections were incubated overnight at 4 °C with primary antibodies (listed in  
148 Supplemental Table 1) in 2% BSA. Slides were then incubated with 1:200 Alexa  
149 Fluor® 488 F(ab')<sub>2</sub>-Goat anti-Rabbit IgG (Invitrogen) and 1:200 Alexa Fluor® 568  
150 F(ab')<sub>2</sub>-Goat Anti-Mouse IgG (Invitrogen) with DAPI in PBS with 2% BSA for one  
151 hour. Sections were mounted with prolong anti-fade mounting reagent (Invitrogen)  
152 and imaged with Olympus FV-1000 inverted confocal fluorescence microscope.  
153 Florescence intensity of the images were quantified using FLUOVIEW 4.2 and  
154 ImageJ software.

#### 155 *Single Cell Patch-clamp Recording*

156 Single cell recordings were made from MCEnC cultured on 25-mm glass coverslips  
157 to ~10–20% confluence to isolate single adhered cells. Membrane voltages were  
158 measured using whole-cell patch electrodes in current clamp mode ( $I_{\text{hold}} = 0$ ) as  
159 previously described [65]. Ammonium evoked responses were sampled at 1kHz and  
160 digitally low-pass filtered at 50Hz using a 7-pole Butterworth filter. Data were  
161 reported as mean (95%CI). Details of data acquisition and statistical analysis can be  
162 found in supplemental material.

#### 163 *Intracellular pH Measurement*

164 Intracellular pH (pH<sub>i</sub>) measurements were performed by monitoring intracellular free  
165 H<sup>+</sup> concentration using pH-sensitive fluorescent dye BCECF-AM (2'7'-  
166 bis(carboxyethyl)-5(6)-carboxyfluorescein-acetoxymethyl ester, B1170; Thermo

167 Fisher Scientific) as described previously [21,22]. Details of experimental settings  
168 can be found in supplemental material.

#### 169 *Western Blotting*

170 Whole-cell lysates from pHCEnC and MCEnC were prepared with RIPA buffer with  
171 proteinase and phosphatase inhibitors. Total protein was quantified by bicinchoninic  
172 acid (BCA) assay, separated and detected on Simple Western system Wes<sup>TM</sup>  
173 (ProteinSimple). Quantification and data analysis were performed in Compass for  
174 SW software (ProteinSimple). Antibodies used are listed in Supplemental Table 1.

#### 175 *Intracellular ATP Assay*

176 MCEnC and pHCEnC were seeded on  $1 \times 10^5$  /mL in 12- and 24-well plates,  
177 respectively, and cultured to sub-confluence. ATP was extracted by a boiling water  
178 method [66], and measured using a luciferin-luciferase based ATP assay kit  
179 (Molecular Probes) following the manufacturer's instructions.

#### 180 *Statistical Analysis*

181 Statistical analysis was performed in GraphPad Prism 7.0 software, unless otherwise  
182 indicated, with appropriate statistical tests based on the data structure. Specific  
183 statistical tests used for each comparison are indicated in figure legends. Data are  
184 presented as mean  $\pm$  SEM unless otherwise indicated. Statistical significance is  
185 denoted as follows in the figures:  $p < 0.05$ , \*;  $p < 0.01$ , \*\*;  $p < 0.001$ , \*\*\*;  $p < 0.0001$ ,  
186 \*\*\*\*.

187 **RESULTS**

188 *SLC4A11 Mutations Do Not Result in Decreased Mutant SLC4A11 Expression*

189 Corneal specimens two individuals with CHED were examined with light microscopy  
190 and immunocytochemistry. One of the two individuals (*SLC4A11*<sup>Mu/Mu</sup>) demonstrated  
191 compound heterozygous mutations in *SLC4A11* (NM\_001174090.1)  
192 c.[473\_480delGCTTCGCCinsC];[2623C>T], p.[(R158PfsX3)];[(Arg875\*)] and the  
193 other (*SLC4A11*<sup>Mu/WT</sup>) demonstrated a single heterozygous *SLC4A11* coding region  
194 mutation [c.2146C>G (p.Pro716Ala)]. Both corneal specimens demonstrated a  
195 significantly thickened Descemet's membrane and an attenuated corneal endothelial  
196 layer with cytoplasmic inclusions present in some cells (Fig. 1A).

197 Immunofluorescence staining for SLC4A11 protein in the corneal endothelium was  
198 performed in conjunction with the use of an antibody against an endoplasmic  
199 reticulum marker, protein disulfide isomerase (PDI), to investigate whether *SLC4A11*  
200 mutations lead to disease via protein misfolding and retention in the endoplasmic  
201 reticulum (ER), as previously reported [5,6,60]. There was no difference in the  
202 corneal endothelial SLC4A11 protein staining intensity between the two specimens  
203 from the individuals with CHED and seven healthy controls. In addition, the staining  
204 localized to the cellular membrane and did not co-localize with PDI (Fig. 1B). Thus,  
205 in the corneal endothelium of these two individuals with CHED, mutant SLC4A11  
206 expression is not reduced compared to wild type SLC4A11 expression in controls,  
207 and remains localized to the cellular membrane instead of being retained in the ER.

208 *SLC4A11/Slc4a11 Reduction Induces Corneal Endothelial Transcriptome Changes*

209 Next, we performed transcriptome analysis in pHCEnC and MCEnC with reduced  
210 SLC4A11/Slc4a11, mimicking the loss of SLC4A11 function in CHED corneal  
211 endothelium. Principle component analysis (PCA) was performed to ensure tight

212 clustering within biological triplicates, and to ensure that the number of dimensions  
213 considered are sufficient in explaining the variances between samples of different  
214 genotypes (Supplemental Figure 1). Based on the shared corneal endothelial  
215 phenotypes between human CHED and the *Slc4a11*<sup>-/-</sup> mouse, we compared the  
216 transcriptomes from *SLC4A11* KD pHCEnC and early and late passage MCEnC  
217 derived from *Slc4a11*<sup>-/-</sup> mice (denoted as pHCEnC, MCEnC early and MCEnC late  
218 sample set, respectively) [25]. A comparison of the genes identified from each  
219 sample set that were differentially expressed in comparison to appropriate controls  
220 revealed 3171 genes that were consensually differentially expressed across three  
221 sample sets (Fig.1C), of which 1041 genes were differentially expressed in the same  
222 direction (Fig.1D). Over a third of the 30 most highly differentially expressed genes  
223 (Fig.1E) have been previously demonstrated to play important functional roles in the  
224 cornea and/or have been associated with corneal diseases, including *SEMA3E* [1],  
225 *MST1R* [67], *RNF43* [68], *SLC2A3* [69], *WNK4* [70], *SLC4A4* [71], *CYGB* [72],  
226 *SLC9A7* [1,73], *ZNF469* [74-77], *BNC1* [78] and *TTC22* [79].

#### 227 *Loss of SLC4A11 Leads to Generalized Inhibition of Cellular Metabolism*

228 Comparison of enriched canonical pathway from *Slc4a11* KD pHCEnC, *Slc4a11*<sup>-/-</sup>  
229 MCEnC early and *Slc4a11*<sup>-/-</sup> MCEnC late sample sets identified a shared generalized  
230 inhibition (defined by negative activation z-score) of multiple metabolic pathways that  
231 were interconnected via intermediate metabolites (Fig.2A, B). A generalized  
232 decrease in the expression of enzyme-encoding genes in these pathways was  
233 observed (Fig.2C-I), a finding that was confirmed for selected genes from each  
234 pathway using qPCR (Fig.2J).

#### 235 *Altered Expression of Channels and Transporters Impairs Transport Function of* 236 *Corneal Endothelium*

237 IPA biological function enrichment analysis identified “transport of molecule” as  
238 the top inhibited function (negative z-score) shared between the transcriptomes of  
239 the pHCEnC, MCEnC early and late samples sets (Fig. 3A). Since SLC4A11 is an  
240 electrogenic  $\text{NH}_3:\text{H}^+$  co-transporter [17], we performed single cell recording of  
241 membrane potential of *Slc4a11*<sup>+/+</sup> and *Slc4a11*<sup>-/-</sup> MCEnC in response to  
242 extracellularly perfused 10 mM  $\text{NH}_4\text{Cl}$ . While exposure to  $\text{NH}_4\text{Cl}$  induced a +12.7  
243 mV (95% CI +5 mV, +20 mV) depolarization in *Slc4a11*<sup>+/+</sup> MCEnC, likely due to the  
244  $\text{NH}_3:\text{H}^+$  permeability provided by Slc4a11, exposure to  $\text{NH}_4\text{Cl}$  induced a -9.50 mV  
245 (95% CI -19.3 mV, -0.5 mV) hyperpolarization in *Slc4a11*<sup>-/-</sup> MCEnC (Fig. 3B, C).

246 To further understand the nature of this depolarization to hyperpolarization shift  
247 resulting from loss of Slc4a11, we examined the list of 1041 genes differentially  
248 expressed in the same direction in pHCEnC, MCEnC early and MCEnC late sample  
249 sets to identify channels and transporters with a  $\log_2\text{FC} > 1$  (Fig. 3D). Twelve genes  
250 encoding ion channels were identified (Fig. 3D) including:  $\text{Cl}^-$  channels (*CLCN3*,  
251 *CLCN2*, *ANO5*) and  $\text{Ca}^{2+}$  channels (*TRPC1*, *TRPV4*, *CACNB1*, *CACNB4*, *TRPV2*),  
252 which were both up- and down-regulated; and  $\text{K}^+$  channels (*KCNAB2*, *KCNMA1*),  
253 which were exclusively down-regulated. Twenty six genes encoding transporters  
254 were identified (Fig. 3D), 12 of which were upregulated and 14 of which were down  
255 regulated. including:  $\text{Na}^+:\text{HCO}_3^-$  co-transporter (*SLC4A4*),  $\text{Ca}^{2+}$ -ATPase (*ATP2B1*),  
256 glucose transporter (*SLC2A1*, *SLC2A13*, *SLC2A3*, *SLC2A12*, *SLC15A2*), glutamine  
257 transporter(*SLC38A1*),  $\text{Cl}^-/\text{HCO}_3^-$  exchanger (*SLC4A3*), ATP-binding cassette (ABC)  
258 transporters (*ABCA8*, *ABCC4*),  $\text{K}^+:\text{Cl}^-$  cotransporter (*SLC12A7*),  $\text{Na}^+/\text{H}^+$  exchanger  
259 regulator (*SLC9A3R2*),  $\text{Na}^+:\text{HPO}_3^-$  co-transporter (*SLC20A1*), lactate transporter  
260 (*SLC16A4*),  $\text{Na}^+$ -carnitine co-transporter (*SLC22A4*, *SLC22A18*),  $\text{SO}_4^{2-}$  transporter  
261 (*SLC26A2*). In particular, electrogenic  $\text{Na}^+:\text{HCO}_3^-$  co-transporter (NBCe1, *SLC4A4*),

262 which plays an essential role in the corneal endothelial ‘pump’ function [29], was  
263 down-regulated 4 fold in *SLC4A11* KD pHCEnC and > 100 fold in *Slc4a11*<sup>-/-</sup> MCEnC  
264 (early and late passage) in transcriptomes of three sample sets (Fig.3D). The  
265 downregulation of SLC4A4/Slc4a4 was verified by qPCR in *SLC4A11* KD pHCEnC  
266 and *Slc4a11*<sup>-/-</sup> MCEnC (Fig. 3E) and by Western blot in *SLC4A11* KD pHCEnC (Fig.  
267 3F). Immunofluorescence staining for NBCe1 (SLC4A4) in the corneal endothelium  
268 of two individuals with CHED showed decreased expression of NBCe1 compared to  
269 control cornea endothelium (Fig. 3G, H).

270 Next, direct functional measurement of Na<sup>+</sup> dependent HCO<sub>3</sub><sup>-</sup> transport in  
271 *Slc4a11*<sup>-/-</sup> MCEnC showed reduced Na<sup>+</sup>-HCO<sub>3</sub><sup>-</sup> co-transporter activity when  
272 compared to *Slc4a11*<sup>+/+</sup> MCEnC (Fig. 3I). In Fig.3I, intracellular pH (pH<sub>i</sub>) was  
273 maintained at a low value when *Slc4a11*<sup>-/-</sup> and *Slc4a11*<sup>+/+</sup> MCEnC were perfused  
274 with Na<sup>+</sup>-free bicarbonate containing ([HCO<sub>3</sub><sup>-</sup>] 28.3 mM) solution. When switched to  
275 a Na<sup>+</sup> containing bicarbonate solution, pH<sub>i</sub> increased as the Na<sup>+</sup>-HCO<sub>3</sub><sup>-</sup> cotransporter  
276 (NBCe1) started to move the weak base HCO<sub>3</sub><sup>-</sup> inward using Na<sup>+</sup> inward  
277 transmembrane electrochemical gradient. We determined the initial slope of this  
278 pH<sub>i</sub> rise (pH<sub>i</sub> recovery) to serve as an indirect measure of Na<sup>+</sup>-HCO<sub>3</sub><sup>-</sup> cotransport  
279 activity, and observed reduced Na<sup>+</sup> dependent pH<sub>i</sub> recovery in *Slc4a11*<sup>-/-</sup> MCEC  
280 than *Slc4A11*<sup>+/+</sup> MCEnC (Fig. 3I, J).

### 281 *Mitochondria Dysfunction Leads to Reduced ATP Production*

282 Dilated mitochondria is a characteristic electron microscopy finding in CHED corneal  
283 endothelium, suggestive of mitochondrial involvement in the pathogenesis [80]. We  
284 identified “Mitochondria Dysfunction” is shared between pHCEnC and MCEnC early  
285 and late sample sets as the top enriched IPA canonical pathway (ranked by p-value,  
286 Fig. 4A). Correspondingly, in the list of 1041 genes differentially expressed in the



287 same direction in pHCEnC, MCEnC early and MCEnC late sample sets, genes  
288 encoding proteins involved in the mitochondria electron transport chain, mediating  
289 mitochondrial ATP flux, import machinery and translation machinery showed a  
290 generalized decreased expression (Fig. 4B, C). The transcriptomes also suggested  
291 ‘autophagy’ was activated (Fig.3A) in *SLC4A11* KD pHCEnC and *Slc4a11*<sup>-/-</sup> MCEnC.  
292 Together with the indication of “mitochondria dysfunction”, we specifically examined  
293 the differential expression of the *STX17/Stx17* gene, which encodes SNARE protein  
294 Syntaxin 17 (STX17) and is an mitophagy initiator facilitating the removal of  
295 dysfunctional mitochondria [81]. *STX17/Stx17* was upregulated in the *SLC4A11* KD  
296 pHCEnC and *Slc4a11*<sup>-/-</sup> MCEnC transcriptomes (Fig. 4D), a finding that was  
297 validated by qPCR in *SLC4A11* KD pHCEnC and *Slc4a11*<sup>-/-</sup> MCEnC (Fig. 4E), by  
298 Western blot in *SLC4A11* KD pHCEnC (Fig. 4F) as well as by immunofluorescence,  
299 which demonstrated increased STX17 expression in CHED corneal endothelium  
300 compared with control (Fig. 4G). As STX17 can only mediate mitophagy where  
301 mitochondria are present, we co-stained for mitochondrial marker COX4 in CHED  
302 corneal endothelium and control (Fig. 4G), which demonstrated significantly  
303 decreased COX4 indicating reduced mitochondria density in CHED corneal  
304 endothelium (Fig.4G). Quantification of the relative STX17 abundance in reference to  
305 mitochondria density (STX17/COX4 ratio) showed increased STX17 level in CHED  
306 corneal endothelium (Fig. 4H). Quantification of COX4 staining intensity showed  
307 significantly reduced COX4 signal in CHED corneal endothelium than in healthy  
308 controls (Fig4 I). Staining CHED endothelium with another mitochondria marker,  
309 cytochrome C, also showed consistently decreased staining intensity (Fig. 4J, K).

310           Given the evidence indicating mitochondrial dysfunction and reduced  
311 mitochondria density in the setting of reduced SLC4A11 expression, we

312 hypothesized that this would result in insufficient ATP energy supply to maintain the  
313 Na<sup>+</sup>-K<sup>+</sup>-ATPase driven corneal endothelial ‘pump’, and the cornea edema that  
314 characterizes CHED. Thus, we performed a direct measurement of the steady state  
315 ATP levels in *SLC4A11* KD pHCEnC and *Slc4a11*<sup>-/-</sup> MCEnC, which revealed  
316 reduced ATP concentrations compared to control scRNA pHCEnC and *Slc4a11*<sup>+/+</sup>  
317 MCEnC, respectively (Fig. 4L, M).

318 *Transcriptomic Changes Associated with Loss of SLC4A11 Are Mediated by*  
319 *Activation of AMPK-p53 Pathway*

320 To identify the upstream signaling pathway leading to the observed transcriptomic  
321 changes in *SLC4A11* KD pHCEnC and *Slc4a11*<sup>-/-</sup> MCEnC, we performed upstream  
322 regulator prediction in IPA, which identified P53 (encoded by *TP53* gene) as the top  
323 candidate transcription factor (Fig. 5A). Western blot analysis in *SLC4A11* KD  
324 pHCEnC demonstrated increased Ser15 phosphorylation of p53 and an increased  
325 phosphorylated p53 / total p53 ratio compared to scRNA pHCEnC control (Fig. 5B),  
326 indicative of activation of p53 transcriptional activity. Similarly, in *Slc4a11*<sup>-/-</sup> MCEnC,  
327 we observed increased Ser18 phosphorylation of p53 (corresponding to Ser15  
328 of human p53) in *Slc4a11*<sup>-/-</sup> MCEnC late passage, although this was not observed in  
329 early passage (Fig.5C). However, there was increased total p53 level in both  
330 *Slc4a11*<sup>-/-</sup> MCEnC early and late passages (Fig.5C, D), indicative of transcriptional  
331 activation of p53.

332 To identify the kinase responsible for the Ser15 (Ser18 in mouse)  
333 phosphorylation and transcriptional activation of p53, we investigated the role of the  
334 cellular ATP sensor AMP-activated protein kinase (AMPK), given the observed ATP  
335 depletion in *SLC4A11* KD pHCEnC and *Slc4a11*<sup>-/-</sup> MCEnC as well as the reported  
336 capacity of AMPK to mediate Ser15 (Ser18 in mouse) phosphorylation and

337 transcriptional activation of p53 [82-84]. In the setting of a decreased ATP-to-ADP  
338 (or ATP-to-AMP) ratio, AMPK catalytic  $\alpha$  subunit will be phosphorylated at Thr172  
339 whereas phosphorylation of regulatory  $\beta$ 1 subunit at Ser182 is not dependent upon  
340 cellular ATP level [85]. In *SLC4A11* KD pHCEnC and *Slc4a11*<sup>-/-</sup> MCEnC, we  
341 observed an increased ratio of Thr172 phosphorylated AMPK $\alpha$  / total AMPK $\alpha$ , and  
342 no change in the ratio of Ser182 phosphorylated AMPK $\beta$ 1 / total AMPK $\beta$ 1 (Fig. 5C).

343 **DISCUSSION**

344 In this manuscript, we utilized human and mouse corneal endothelial cell lines with  
345 reduced expression of SLC4A11/Slc4a11 to investigate the cause of corneal  
346 endothelial dysfunction that characterizes each of the *SLC4A11*-associated corneal  
347 endothelial dystrophies (CHED, FECD and Harboyan syndrome. While several  
348 previous reports have elucidated possible roles for mitochondrial uncoupling, ER  
349 unfolded protein response, oxidative stress and apoptosis in SLC4A11-deficient cell  
350 lines [11,22,23,39,60,86], only one report examined CHED patient corneal  
351 endothelium and demonstrated increased oxidative stress [22]. We identified ATP  
352 depletion in corneal endothelial lacking SLC4A11/Slc4a11, in both transient (72  
353 hours) *SLC4A11* knock-down pHCEnC and permanent *Slc4a11* knockout MCEnC  
354 through prolonged passage (early vs late passage). The reduced corneal endothelial  
355 ATP levels provide a proposed pathogenesis for the corneal endothelial dysfunction,  
356 which clinically manifested as corneal edema. The fact that ATP depletion and ATP-  
357 sensor AMPK $\alpha$  activation were detected within 72 hours of *SLC4A11* knock-down in  
358 pHCEnC suggests this energy shortage from the loss of SLC4A11 function is likely  
359 the initial step in the pathogenesis of *SLC4A11*-associated corneal endothelial  
360 dystrophies that leads to the downstream cascade of oxidative stress and apoptotic  
361 cell loss.

362 When examining the expression and localization of SLC4A11 protein in CHED  
363 corneal endothelium, we provide the initial evidence that mutant SLC4A11 protein is  
364 not retained in the ER of the corneal endothelium. While the prevailing hypothesis is  
365 that majority of *SLC4A11* mutations result in protein misfolding and retention in the  
366 endoplasmic reticulum [5,6,60,61], supporting evidence is from overexpression of  
367 SLC4A11 mutants in a HEK293 cell line model. Mutant SLC4A11 localization was

368 neither investigated in corneal endothelial cells overexpressing SLC4A11 mutants  
369 nor in corneal endothelium from individuals with CHED. In addition, our  
370 immunostaining of CHED corneal endothelium did not show reduced expression  
371 level of the SLC4A11 mutant protein, consistent with the previous report that CHED  
372 corneal endothelium does not demonstrate reduced SLC4A11 expression at the  
373 mRNA level [22]. Instead, our data supports the alternative hypothesis that  
374 identified *SLC4A11* mutations affect the protein transport function of the SLC4A11  
375 protein in the corneal endothelium [19,62,63].

376 We used a comparative transcriptomics approach based on the observation of  
377 phenotypic similarities between CHED and the *Slc4a11*<sup>-/-</sup> mouse corneal phenotype  
378 [40,87]. This approach is based on the high degree of gene orthology between  
379 mouse and human and the organ-dominated hierarchical clustering observed across  
380 mammals on real genes expression data [88]. Comparative transcriptomic analysis  
381 of human and mouse sample sets together is advantageous over independent  
382 transcriptomic analysis of each sample set as it enables us to identify transcriptome  
383 determinants attributable to the loss of SLC4A11/Slc4a11 from that resulting from  
384 other biological factors or technical effects such as primary cell passage numbers,  
385 cell line immortalization, siRNA treatment, differences in culture medium and etc [89].  
386 With this approach, we identified generalized inhibition of multiple metabolic  
387 pathways, as well as mitochondria dysfunction in both *SLC4A11* KD pHCEnC and  
388 *Slc4a11*<sup>-/-</sup> MCEnC, mediated via the activation of the AMPK-p53 pathway. The data  
389 presented here support the use of the *Slc4a11*<sup>-/-</sup> mice as a model for the *SLC4A11*  
390 associated corneal endothelial dystrophies and indicate a favorable translational  
391 potential for therapeutic approaches shown to be efficacious in the *Slc4a11*<sup>-/-</sup> mice.

392           When investigating the impact of reduced SLC4A11 on molecule transport  
393 function in corneal endothelial cells, we demonstrated opposite NH<sub>4</sub>Cl induced  
394 membrane potential change in *Slc4a11*<sup>-/-</sup> versus *Slc4a11*<sup>+/+</sup> MCEnC. Membrane  
395 depolarization in reaction to extracellular NH<sub>4</sub>Cl exposure were commonly observed  
396 in membranes with permeability to NH<sub>4</sub><sup>+</sup>/NH<sub>3</sub> (membranes expressing ammonia or  
397 ammonium transporters/channels such as AQP8, AQP4, AMT1 and Rh-associated  
398 glycoproteins) [90,91]. In *Slc4a11*<sup>+/+</sup> MCEnC, extracellular NH<sub>4</sub>Cl perfusion induced  
399 similar membrane depolarization. However, in *Slc4a11*<sup>-/-</sup> MCEnC, hyperpolarization  
400 was observed. Transcriptome data showed differential expression of 38 ion channels  
401 and transporters, suggesting SLC4A11 not only facilitates NH<sub>4</sub><sup>+</sup>/NH<sub>3</sub> transmembrane  
402 movement but may also functions in maintaining the homeostasis of the endothelial  
403 transmembrane ion gradient by regulating the expression and function of other  
404 channels/transporters. This hypothesis is supported by the observation of reduced  
405 expression and activity of the Na<sup>+</sup>-HCO<sub>3</sub><sup>-</sup> co-transporter (NBCe1, *SLC4A4*) in  
406 *Slc4a11*<sup>-/-</sup> MCEnC. Future investigation analyzing the activity of other differentially  
407 expressed ion channels and transporters is needed to facilitate our detailed  
408 understanding of the impact of SLC4A11 reduction on corneal endothelial “pump  
409 function”.

410           Our attempt to identify upstream determinants of the observed transcriptomic  
411 changes revealed activation of AMPK-p53 pathway in *SLC4A11* KD pHCEnC and  
412 *Slc4a11*<sup>-/-</sup> MCEnC. Our data suggests that AMPK activation is likely to be the initial  
413 cellular event in response to SLC4A11 deficiency induced ATP depletion. While  
414 there was consistent AMPK activation (increased Thr172 phosphorylation) in both  
415 acute SLC4A11 deficiency in pHCEnC and chronic SLC4A11 deficiency in MCEnC,  
416 and increased p53 phosphorylation at Ser15 (or Ser18 in mouse) was only observed

417 in *SLC4A11* KD pHCEnC and *Slc4a11*<sup>-/-</sup> MCEnC late passage, but not in *Slc4a11*<sup>-/-</sup>  
418 MCEnC early passage. However, total p53 level was elevated in both early and late  
419 passages of MCEnC with permanent knockout of *Slc4a11*. Although p53 is generally  
420 stably expressed at the protein level, recent evidence suggests activation of  
421 AMPK $\alpha$  can induce the transcriptional activation of p53 [83]. In the context of our  
422 data, it suggests that short-term AMPK $\alpha$  activation in SLC4A11 deficiency induced  
423 post-translational activation of p53, whereas prolonged AMPK $\alpha$  activation in  
424 SLC4A11 deficiency induced transcriptional activation of p53.

425 ACKNOWLEDGEMENTS

426 We genuinely thank Dr. Huong Duong in Ho Chi Minh City Eye Hospital for  
427 facilitating the acquisition of postsurgical corneal endothelium specimens from  
428 individuals with CHED.

429 Support is provided by National Eye Institute Grants 1R01EY022082 (A.J.A.),  
430 P30EY000331 (core grant), the Walton Li Chair in Cornea and Uveitis (A.J.A.), the  
431 Stotter Revocable Trust (SEI Cornea Division), an unrestricted grant from Research  
432 to Prevent Blindness (A.J.A.), National Institute of Diabetes and Digestive and  
433 Kidney Diseases 1R01DK077162 (I.K.), the Allan Smidt Charitable Fund (I.K.), Ralph  
434 Block Family Foundation (I.K.) and Knights Templar Eye Foundation Career Starter  
435 Grant (WZ).

436

437 STATEMENT OF AUTHOR CONTRIBUTIONS

438 W.Z., R.F., C.G.G., L.K. and A.J.A. conceived the experiments, W.Z. and A.J.A.  
439 wrote the manuscript, W.Z., R.F., D.C, C.G.G., L.K., A.C. and R.A. performed the  
440 experiments. W.Z. A.S., I.K., and A.J.A. secured funding. A.S. and I.K. provided  
441 expertise and feedback.

442



443 REFERENCE LIST

- 444 1. Frausto RF, Wang C, Aldave AJ. Transcriptome Analysis of the Human Corneal Endothelium.  
445 *Investigative Ophthalmology & Visual Science* 2014; **55**: 7821-7830.
- 446 2. Chng Z, Peh GS, Herath WB, *et al.* High throughput gene expression analysis identifies  
447 reliable expression markers of human corneal endothelial cells. *PLoS One* 2013; **8**: e67546.
- 448 3. Chen Y, Huang K, Nakatsu MN, *et al.* Identification of novel molecular markers through  
449 transcriptomic analysis in human fetal and adult corneal endothelial cells. *Human Molecular*  
450 *Genetics* 2012; **22**: 1271-1279.
- 451 4. Aldahmesh MA, Khan AO, Meyer BF, *et al.* Mutational spectrum of SLC4A11 in autosomal  
452 recessive CHED in Saudi Arabia. *Invest Ophthalmol Vis Sci* 2009; **50**: 4142-4145.
- 453 5. Vithana EN, Morgan PE, Ramprasad V, *et al.* SLC4A11 mutations in Fuchs endothelial corneal  
454 dystrophy. *Hum Mol Genet* 2008; **17**: 656-666.
- 455 6. Vithana EN, Morgan P, Sundaresan P, *et al.* Mutations in sodium-borate cotransporter  
456 SLC4A11 cause recessive congenital hereditary endothelial dystrophy (CHED2). *Nat Genet*  
457 2006; **38**: 755-757.
- 458 7. Desir J, Moya G, Reish O, *et al.* Borate transporter SLC4A11 mutations cause both Harboyan  
459 syndrome and non-syndromic corneal endothelial dystrophy. *J Med Genet* 2007; **44**: 322-326.
- 460 8. Khuc E, Bainer R, Wolf M, *et al.* Comprehensive characterization of DNA methylation  
461 changes in Fuchs endothelial corneal dystrophy. *PLoS One* 2017; **12**: e0175112.
- 462 9. Gottsch JD, Bowers AL, Margulies EH, *et al.* Serial Analysis of Gene Expression in the Corneal  
463 Endothelium of Fuchs' Dystrophy. *Investigative Ophthalmology & Visual Science* 2003; **44**:  
464 594-599.
- 465 10. Dana M-R, Moyes AL, Gomes JAP, *et al.* The Indications for and Outcome in Pediatric  
466 Keratoplasty: A Multicenter Study. *Ophthalmology* 1995; **102**: 1129-1138.
- 467 11. Siddiqui S, Zenteno JC, Rice A, *et al.* Congenital hereditary endothelial dystrophy caused by  
468 SLC4A11 mutations progresses to Harboyan syndrome. *Cornea* 2014; **33**: 247-251.
- 469 12. Lorenzetti DW, Uotila MH, Parikh N, *et al.* Central cornea guttata. Incidence in the general  
470 population. *Am J Ophthalmol* 1967; **64**: 1155-1158.
- 471 13. 2018 Eye Banking Statistical Report. *Eye Bank Association of America* 2019.
- 472 14. Gain P, Jullienne R, He Z, *et al.* Global Survey of Corneal Transplantation and Eye Banking.  
473 *JAMA Ophthalmology* 2016; **134**: 167-173.
- 474 15. Dorrepaal SJ, Cao KY, Slomovic AR. Indications for penetrating keratoplasty in a tertiary  
475 referral centre in Canada, 1996-2004. *Can J Ophthalmol* 2007; **42**: 244-250.
- 476 16. Ghosheh FR, Cremona FA, Rapuano CJ, *et al.* Trends in penetrating keratoplasty in the  
477 United States 1980-2005. *Int Ophthalmol* 2008; **28**: 147-153.
- 478 17. Zhang W, Ogando DG, Bonanno JA, *et al.* Human SLC4A11 Is a Novel NH<sub>3</sub>/H<sup>+</sup> Co-transporter.  
479 *J Biol Chem* 2015; **290**: 16894-16905.
- 480 18. Myers EJ, Marshall A, Jennings ML, *et al.* Mouse Slc4a11 expressed in *Xenopus* oocytes is an  
481 ideally selective H<sup>+</sup>/OH<sup>-</sup> conductance pathway that is stimulated by rises in intracellular and  
482 extracellular pH. *Am J Physiol Cell Physiol* 2016; **311**: C945-C959.
- 483 19. Vilas GL, Loganathan SK, Liu J, *et al.* Transmembrane water-flux through SLC4A11: a route  
484 defective in genetic corneal diseases. *Hum Mol Genet* 2013; **22**: 4579-4590.
- 485 20. Ogando DG, Jalimarada SS, Zhang W, *et al.* SLC4A11 is an EIPA-sensitive Na<sup>(+)</sup> permeable pH  
486 regulator. *Am J Physiol Cell Physiol* 2013; **305**: C716-727.
- 487 21. Kao L, Azimov R, Shao XM, *et al.* Multifunctional ion transport properties of human SLC4A11:  
488 comparison of the SLC4A11-B and SLC4A11-C variants. *Am J Physiol Cell Physiol* 2016; **311**:  
489 C820-C830.

- 490 22. Guha S, Chaurasia S, Ramachandran C, *et al.* SLC4A11 depletion impairs NRF2 mediated  
491 antioxidant signaling and increases reactive oxygen species in human corneal endothelial  
492 cells during oxidative stress. *Sci Rep* 2017; **7**: 4074.
- 493 23. Liu J, Seet LF, Koh LW, *et al.* Depletion of SLC4A11 causes cell death by apoptosis in an  
494 immortalized human corneal endothelial cell line. *Invest Ophthalmol Vis Sci* 2012; **53**: 3270-  
495 3279.
- 496 24. Zhang W, Li H, Ogando DG, *et al.* Glutaminolysis is Essential for Energy Production and Ion  
497 Transport in Human Corneal Endothelium. *EBioMedicine* 2017; **16**: 292-301.
- 498 25. Zhang W, Ogando DG, Kim ET, *et al.* Conditionally Immortal Slc4a11<sup>-/-</sup> Mouse Corneal  
499 Endothelial Cell Line Recapitulates Disrupted Glutaminolysis Seen in Slc4a11<sup>-/-</sup> Mouse Model.  
500 *Invest Ophthalmol Vis Sci* 2017; **58**: 3723-3731.
- 501 26. Wang Q, Zou Y, Nowotschin S, *et al.* The p53 Family Coordinates Wnt and Nodal Inputs in  
502 Mesendodermal Differentiation of Embryonic Stem Cells. *Cell Stem Cell* 2017; **20**: 70-86.
- 503 27. Younger ST, Kenzelmann-Broz D, Jung H, *et al.* Integrative genomic analysis reveals  
504 widespread enhancer regulation by p53 in response to DNA damage. *Nucleic Acids Res* 2015;  
505 **43**: 4447-4462.
- 506 28. Edelhauser HF. The balance between corneal transparency and edema: the Proctor Lecture.  
507 *Invest Ophthalmol Vis Sci* 2006; **47**: 1754-1767.
- 508 29. Bonanno JA. Molecular mechanisms underlying the corneal endothelial pump. *Exp Eye Res*  
509 2012; **95**: 2-7.
- 510 30. Srinivas SP. Dynamic regulation of barrier integrity of the corneal endothelium. *Optom Vis*  
511 *Sci* 2010; **87**: E239-254.
- 512 31. Hedblom EE. The role of polysaccharides in corneal swelling. *Exp Eye Res* 1961; **1**: 81-91.
- 513 32. Hedbys BO, Mishima S, Maurice DM. The Imbibition Pressure of the Corneal Stroma. *Exp Eye*  
514 *Res* 1963; **2**: 99-111.
- 515 33. Maurice DM. The transparency of the corneal stroma. *Vision research* 1970; **10**: 107-108.
- 516 34. Noske W, Fromm M, Levarlet B, *et al.* Tight junctions of the human corneal endothelium:  
517 morphological and electrophysiological features. *Ger J Ophthalmol* 1994; **3**: 253-257.
- 518 35. Ma L, Kuang K, Smith RW, *et al.* Modulation of tight junction properties relevant to fluid  
519 transport across rabbit corneal endothelium. *Exp Eye Res* 2007; **84**: 790-798.
- 520 36. Maurice DM, Srinivas SP. Fluorometric measurement of light absorption by the rabbit cornea.  
521 *Exp Eye Res* 1994; **58**: 409-413.
- 522 37. Bonanno JA. Identity and regulation of ion transport mechanisms in the corneal endothelium.  
523 *Prog Retin Eye Res* 2003; **22**: 69-94.
- 524 38. Riley MV, Winkler BS, Peters MI, *et al.* Relationship between fluid transport and in situ  
525 inhibition of Na(+)-K+ adenosine triphosphatase in corneal endothelium. *Invest Ophthalmol*  
526 *Vis Sci* 1994; **35**: 560-567.
- 527 39. Ogando DG, Choi M, Shyam R, *et al.* Ammonia sensitive SLC4A11 mitochondrial uncoupling  
528 reduces glutamine induced oxidative stress. *Redox Biology* 2019; **26**: 101260.
- 529 40. Han SB, Ang HP, Poh R, *et al.* Mice with a targeted disruption of Slc4a11 model the  
530 progressive corneal changes of congenital hereditary endothelial dystrophy. *Invest*  
531 *Ophthalmol Vis Sci* 2013; **54**: 6179-6189.
- 532 41. Jiao X, Sultana A, Garg P, *et al.* Autosomal recessive corneal endothelial dystrophy (CHED2) is  
533 associated with mutations in SLC4A11. *J Med Genet* 2007; **44**: 64-68.
- 534 42. Hemadevi B, Veitia RA, Srinivasan M, *et al.* Identification of mutations in the SLC4A11 gene  
535 in patients with recessive congenital hereditary endothelial dystrophy. *Archives of*  
536 *ophthalmology* 2008; **126**: 700-708.
- 537 43. Sultana A, Garg P, Ramamurthy B, *et al.* Mutational spectrum of the SLC4A11 gene in  
538 autosomal recessive congenital hereditary endothelial dystrophy. *Mol Vis* 2007; **13**: 1327-  
539 1332.

- 540 44. Aldave AJ, Yellore VS, Bourla N, *et al.* Autosomal recessive CHED associated with novel  
541 compound heterozygous mutations in SLC4A11. *Cornea* 2007; **26**: 896-900.
- 542 45. Ramprasad VL, Ebenezer ND, Aung T, *et al.* Novel SLC4A11 mutations in patients with  
543 recessive congenital hereditary endothelial dystrophy (CHED2). Mutation in brief #958.  
544 Online. *Human mutation* 2007; **28**: 522-523.
- 545 46. Shah SS, Al-Rajhi A, Brandt JD, *et al.* Mutation in the SLC4A11 gene associated with  
546 autosomal recessive congenital hereditary endothelial dystrophy in a large Saudi family.  
547 *Ophthalmic Genet* 2008; **29**: 41-45.
- 548 47. Kumar A, Bhattacharjee S, Prakash DR, *et al.* Genetic analysis of two Indian families affected  
549 with congenital hereditary endothelial dystrophy: two novel mutations in SLC4A11. *Mol Vis*  
550 2007; **13**: 39-46.
- 551 48. Paliwal P, Sharma A, Tandon R, *et al.* Congenital hereditary endothelial dystrophy - mutation  
552 analysis of SLC4A11 and genotype-phenotype correlation in a North Indian patient cohort.  
553 *Mol Vis* 2010; **16**: 2955-2963.
- 554 49. Liskova P, Dudakova L, Tesar V, *et al.* Detailed assessment of renal function in a proband  
555 with Harboyan syndrome caused by a novel homozygous SLC4A11 nonsense mutation.  
556 *Ophthalmic research* 2015; **53**: 30-35.
- 557 50. Kodaganur SG, Kapoor S, Veerappa AM, *et al.* Mutation analysis of the SLC4A11 gene in  
558 Indian families with congenital hereditary endothelial dystrophy 2 and a review of the  
559 literature. *Mol Vis* 2013; **19**: 1694-1706.
- 560 51. Park SH, Jeong HJ, Kim M, *et al.* A novel nonsense mutation of the SLC4A11 gene in a Korean  
561 patient with autosomal recessive congenital hereditary endothelial dystrophy. *Cornea* 2013;  
562 **32**: e181-182.
- 563 52. Kumawat BL, Gupta R, Sharma A, *et al.* Delayed onset of congenital hereditary endothelial  
564 dystrophy due to compound heterozygous SLC4A11 mutations. *Indian J Ophthalmol* 2016; **64**:  
565 492-495.
- 566 53. Kim JH, Ko JM, Tchah H. Fuchs Endothelial Corneal Dystrophy in a Heterozygous Carrier of  
567 Congenital Hereditary Endothelial Dystrophy Type 2 with a Novel Mutation in SLC4A11.  
568 *Ophthalmic Genet* 2015; **36**: 284-286.
- 569 54. Kaul H, Suman M, Khan Z, *et al.* Missense mutation in SLC4A11 in two Pakistani families  
570 affected with congenital hereditary endothelial dystrophy (CHED2). *Clin Exp Optom* 2016; **99**:  
571 73-77.
- 572 55. Cunnusamy K, Bowman CB, Beebe W, *et al.* Congenital Corneal Endothelial Dystrophies  
573 Resulting From Novel De Novo Mutations. *Cornea* 2016; **35**: 281-285.
- 574 56. Hand CK, McGuire M, Parfrey NA, *et al.* Homozygous SLC4A11 mutation in a large Irish  
575 CHED2 pedigree. *Ophthalmic Genet* 2017; **38**: 148-151.
- 576 57. Brejchova K, Dudakova L, Skalicka P, *et al.* iPSC-Derived Corneal Endothelial-like Cells Act as  
577 an Appropriate Model System to Assess the Impact of SLC4A11 Variants on Pre-mRNA  
578 Splicing Corneal Endothelial-like Cells Expressing SLC4A11. *Investigative Ophthalmology &*  
579 *Visual Science* 2019; **60**: 3084-3090.
- 580 58. Moazzeni H, Javadi MA, Asgari D, *et al.* Observation of nine previously reported and 10 non-  
581 reported <em>SLC4A11</em> mutations among 20 Iranian CHED probands and  
582 identification of an <em>MPDZ</em> mutation as possible cause of CHED and FECD in one  
583 family. *British Journal of Ophthalmology* 2019; e314377.
- 584 59. Alka K, Casey JR. Ophthalmic Nonsteroidal Anti-Inflammatory Drugs as a Therapy for Corneal  
585 Dystrophies Caused by SLC4A11 Mutation. *Invest Ophthalmol Vis Sci* 2018; **59**: 4258-4267.
- 586 60. Alka K, Casey JR. Molecular phenotype of SLC4A11 missense mutants: Setting the stage for  
587 personalized medicine in corneal dystrophies. *Human mutation* 2018; **39**: 676-690.
- 588 61. Malhotra D, Loganathan SK, Chiu AM, *et al.* Human Corneal Expression of SLC4A11, a Gene  
589 Mutated in Endothelial Corneal Dystrophies. *Scientific Reports* 2019; **9**: 9681.

- 590 62. Li S, Hundal KS, Chen X, *et al.* R125H, W240S, C386R, and V507I SLC4A11 mutations  
591 associated with corneal endothelial dystrophy affect the transporter function but not  
592 trafficking in PS120 cells. *Exp Eye Res* 2019; **180**: 86-91.
- 593 63. Kao L, Azimov R, Abuladze N, *et al.* Human SLC4A11-C functions as a DIDS-stimulatable  
594 H(+)(OH(-)) permeation pathway: partial correction of R109H mutant transport. *Am J Physiol*  
595 *Cell Physiol* 2015; **308**: C176-188.
- 596 64. Frausto RF, Le DJ, Aldave AJ. Transcriptomic Analysis of Cultured Corneal Endothelial Cells as  
597 a Validation for Their Use in Cell Replacement Therapy. *Cell Transplant* 2016; **25**: 1159-1176.
- 598 65. Wang T, Pahlberg J, Cafaro J, *et al.* Activation of Rod Input in a Model of Retinal  
599 Degeneration Reverses Retinal Remodeling and Induces Formation of Functional Synapses  
600 and Recovery of Visual Signaling in the Adult Retina. *J Neurosci* 2019; **39**: 6798-6810.
- 601 66. Yang NC, Ho WM, Chen YH, *et al.* A convenient one-step extraction of cellular ATP using  
602 boiling water for the luciferin-luciferase assay of ATP. *Anal Biochem* 2002; **306**: 323-327.
- 603 67. Swamynathan SK, Davis J, Piatigorsky J. Identification of candidate Klf4 target genes reveals  
604 the molecular basis of the diverse regulatory roles of Klf4 in the mouse cornea. *Invest*  
605 *Ophthalmol Vis Sci* 2008; **49**: 3360-3370.
- 606 68. Okumura N, Nakamura T, Kay EP, *et al.* R-spondin1 regulates cell proliferation of corneal  
607 endothelial cells via the Wnt3a/beta-catenin pathway. *Invest Ophthalmol Vis Sci* 2014; **55**:  
608 6861-6869.
- 609 69. Chng Z, Peh GSL, Herath WB, *et al.* High Throughput Gene Expression Analysis Identifies  
610 Reliable Expression Markers of Human Corneal Endothelial Cells. *PLoS ONE* 2013; **8**: e67546.
- 611 70. Shimizu M, Goto T, Sato A, *et al.* WNK4 is an essential effector of anterior formation in FGF  
612 signaling. *Genes Cells* 2013; **18**: 442-449.
- 613 71. Bonanno JA. Molecular mechanisms underlying the corneal endothelial pump. *Experimental*  
614 *eye research* 2012; **95**: 2-7.
- 615 72. Ostojic J, Grozdanic S, Syed NA, *et al.* Neuroglobin and cytoglobin distribution in the anterior  
616 eye segment: a comparative immunohistochemical study. *J Histochem Cytochem* 2008; **56**:  
617 863-872.
- 618 73. Cheong YK, Ngoh ZX, Peh GS, *et al.* Identification of cell surface markers glypican-4 and  
619 CD200 that differentiate human corneal endothelium from stromal fibroblasts. *Invest*  
620 *Ophthalmol Vis Sci* 2013; **54**: 4538-4547.
- 621 74. Yildiz E, Bardak H, Gunay M, *et al.* Novel Zinc Finger Protein Gene 469 (ZNF469) Variants in  
622 Advanced Keratoconus. *Curr Eye Res* 2017; **42**: 1396-1400.
- 623 75. Vincent AL, Jordan CA, Cadzow MJ, *et al.* Mutations in the zinc finger protein gene, ZNF469,  
624 contribute to the pathogenesis of keratoconus. *Invest Ophthalmol Vis Sci* 2014; **55**: 5629-  
625 5635.
- 626 76. Lechner J, Porter LF, Rice A, *et al.* Enrichment of pathogenic alleles in the brittle cornea gene,  
627 ZNF469, in keratoconus. *Hum Mol Genet* 2014; **23**: 5527-5535.
- 628 77. Lu Y, Dimasi DP, Hysi PG, *et al.* Common genetic variants near the Brittle Cornea Syndrome  
629 locus ZNF469 influence the blinding disease risk factor central corneal thickness. *PLoS Genet*  
630 2010; **6**: e1000947.
- 631 78. Zhang X, Tseng H. Basonuclin-null mutation impairs homeostasis and wound repair in mouse  
632 corneal epithelium. *PLoS One* 2007; **2**: e1087.
- 633 79. Chung DD, Frausto RF, Lin BR, *et al.* Transcriptomic Profiling of Posterior Polymorphous  
634 Corneal Dystrophy. *Invest Ophthalmol Vis Sci* 2017; **58**: 3202-3214.
- 635 80. Ehlers N, Modis L, Moller-Pedersen T. A morphological and functional study of Congenital  
636 Hereditary Endothelial Dystrophy. *Acta Ophthalmol Scand* 1998; **76**: 314-318.
- 637 81. Xian H, Yang Q, Xiao L, *et al.* STX17 dynamically regulated by Fis1 induces mitophagy via  
638 hierarchical macroautophagic mechanism. *Nature Communications* 2019; **10**: 2059.

- 639 82. Nieminen AI, Eskelinen VM, Haikala HM, *et al.* Myc-induced AMPK-phospho p53 pathway  
640 activates Bak to sensitize mitochondrial apoptosis. *Proceedings of the National Academy of*  
641 *Sciences* 2013; **110**: E1839-E1848.
- 642 83. Okoshi R, Ozaki T, Yamamoto H, *et al.* Activation of AMP-activated Protein Kinase Induces  
643 p53-dependent Apoptotic Cell Death in Response to Energetic Stress. *Journal of Biological*  
644 *Chemistry* 2008; **283**: 3979-3987.
- 645 84. Jones RG, Plas DR, Kubek S, *et al.* AMP-Activated Protein Kinase Induces a p53-Dependent  
646 Metabolic Checkpoint. *Molecular Cell* 2005; **18**: 283-293.
- 647 85. Herzig S, Shaw RJ. AMPK: guardian of metabolism and mitochondrial homeostasis. *Nature*  
648 *Reviews Molecular Cell Biology* 2017; **19**: 121.
- 649 86. Loganathan SK, Casey JR. Corneal dystrophy-causing SLC4A11 mutants: suitability for folding-  
650 correction therapy. *Human mutation* 2014; **35**: 1082-1091.
- 651 87. Kirkness CM, McCartney A, Rice NS, *et al.* Congenital hereditary corneal oedema of  
652 Maumenee: its clinical features, management, and pathology. *Br J Ophthalmol* 1987; **71**:  
653 130-144.
- 654 88. Breschi A, Djebali S, Gillis J, *et al.* Gene-specific patterns of expression variation across  
655 organs and species. *Genome Biology* 2016; **17**: 151.
- 656 89. Breschi A, Gingeras TR, Guigo R. Comparative transcriptomics in human and mouse. *Nat Rev*  
657 *Genet* 2017; **18**: 425-440.
- 658 90. Assentoft M, Kaptan S, Schneider H-P, *et al.* Aquaporin 4 as a NH<sub>3</sub> Channel. *The Journal of*  
659 *biological chemistry* 2016; **291**: 19184-19195.
- 660 91. Mak D-OD, Dang B, Weiner ID, *et al.* Characterization of ammonia transport by the kidney Rh  
661 glycoproteins RhBG and RhCG. *American Journal of Physiology-Renal Physiology* 2006; **290**:  
662 F297-F305.
- 663

664 FIGURE LEGEND

665 **Figure 1. SLC4A11 deficiency leads to transcriptome alteration in corneal**  
666 **endothelium.** (A) Histopathologic examination of control and CHED corneas  
667 demonstrating Descemet membrane thickening and endothelial cell attenuation in  
668 corneas from individuals with CHED (H&E stain, scale bar, 25  $\mu\text{m}$ ). (B) Left:  
669 representative images of immunofluorescence staining for SLC4A11 (green signal)  
670 and ER marker PDI (red signal) in corneal endothelium of two individuals with CHED  
671 and healthy control. Nucleus were stained with DAPI (blue signal) (Scale bar, 100  
672  $\mu\text{m}$ ); Right: scatterplot of mean fluorescence intensity (MFI) ratio of SLC4A11 over  
673 PDI in corneal endothelium of two individuals with CHED and of 7 healthy controls.  
674 (two-tailed unpaired t-test with Welch's correction,  $p = 0.5127$ ). (C) Venn diagram of  
675 the endothelial transcriptome in *SLC4A11* KD pHCEnC, *Slc4a11*<sup>-/-</sup> MCEnC early and  
676 late passages indicating the number of differentially expressed genes (DEG) in each  
677 of the sample sets. (D) Venn diagram of the endothelial transcriptome in *SLC4A11*  
678 KD pHCEnC, *Slc4a11*<sup>-/-</sup> MCEnC early and late passages indicating the number of  
679 genes differentially expressed in the same direction in each of the sample sets. (E)  
680 Heatmap of top 30 most highly differentially expressed genes shared between  
681 *SLC4A11* KD pHCEnC, *Slc4a11*<sup>-/-</sup> MCEnC early and late passages. Genes are  
682 clustered based on cellular localization of the gene product.

683

684 **Figure 2. Inhibition of multiple metabolic pathways in SLC4A11-deficient**  
685 **corneal endothelial cells.** (A) Heatmap showing consensually enriched IPA  
686 canonical pathways from comparison of transcriptomes of *SLC4A11* KD pHCEnC,  
687 *Slc4a11*<sup>-/-</sup> MCEnC early and late passages (sorted by mean “activation z-score”) (B)  
688 Schematic illustration of the crosstalk between identified inhibited metabolic  
689 pathways. Differentially expressed genes encoding key enzymes are color coded  
690 using the same color as used in C-I. Transcript levels of differentially expressed  
691 enzyme-coding genes involved in: (C) citric acid (TCA) cycle (*IDH3G*, isocitrate  
692 dehydrogenase 3 (NAD<sup>+</sup>) gamma; *SUCLA2*, succinate-CoA ligase ADP-forming beta  
693 subunit; *SDHD*, succinate dehydrogenase complex subunit D; and *FH*, fumarate  
694 hydratase); (D) glycolysis (*GLUT1/3*, glucose transporter type 1 and 3; *GPI*, glucose-  
695 6-phosphate isomerase; *PFKL*, phosphofructokinase, liver type; *PFKP*,  
696 phosphofructokinase, platelet; *ALDOA*, aldolase, fructose-bisphosphate A; *TPI1*,  
697 triosephosphate isomerase 1; *PGK1*, phosphoglycerate kinase 1; *ENO1*, enolase 1;  
698 and *LDHD*, lactate dehydrogenase); (E) acetyl-CoA biosynthesis/pyruvate  
699 dehydrogenase (PDH) complex (*PDK3*, pyruvate dehydrogenase kinase 3; *PDHB*,  
700 pyruvate dehydrogenase E1 beta subunit; and *DLAT*, dihydrolipoamide S-  
701 acetyltransferase); (F) glutaminolysis (*SNAT1*, system N amino acid transporter 1;  
702 and *GOT2*, glutamic-oxaloacetic transaminase 2); (G) pentose phosphate shunt  
703 (*G6PD*, glucose-6-phosphate dehydrogenase; and *PGD*, phosphogluconate  
704 dehydrogenase); (H) GDP-Mannose synthesis (*MPI*, mannose phosphate isomerase;  
705 *GMPPB*, GDP-mannose pyrophosphorylase B in UDP-acetyl-galactosamine  
706 synthesis; *GNPDA1*, glucosamine-6-phosphate deaminase 1; and *PGM2L1*,  
707 phosphoglucomutase 2 like 1); (I) pyrimidine ribonucleotides (UTP/CTP) and  
708 pyrimidine deoxyribonucleotides (dTTP/dCTP) *de novo* synthesis (*CAD*, carbamoyl-

709 phosphate synthetase 2, aspartate transcarbamylase, and dihydroorotase; *CMPK1*,  
710 cytidine/uridine monophosphate kinase 1; *RRM1*, ribonucleotide reductase catalytic  
711 subunit M1; *RRM2*, ribonucleotide reductase regulatory subunit M2; *NME1*,  
712 NME/NM23 nucleoside diphosphate kinase 1 and *NME2*, NME/NM23 nucleoside  
713 diphosphate kinase 2). (J) Selected differentially expressed genes from each  
714 pathway listed above were validated by qPCR in separate RNA isolations from  
715 *SLC4A11* KD pHCEnC and *Slc4a11*<sup>-/-</sup> MCEnC early and late passages. Genes from  
716 different pathways are clustered and separated by dashed lines.  
717



718 **Figure 3. SLC4A11 deficiency impacts corneal endothelial ion and solute**  
719 **transport function.** (A) Heatmap showing consensually enriched IPA biological  
720 function pathways from comparison of transcriptomes of SLC4A11 KD pHCEnC,  
721 *Slc4a11*<sup>-/-</sup> MCEnC early and late passages (sorted by mean “activation z-score”). (B)  
722 Representative trace of current-clamped single cell recording during 10 mM NH<sub>4</sub>Cl  
723 superfusion of *Slc4a11*<sup>+/+</sup> and *Slc4a11*<sup>-/-</sup> MCEnC. (C) Boxplot of membrane potential  
724 changes (*dV*<sub>m</sub>) in *Slc4a11*<sup>+/+</sup> (n = 6) and *Slc4a11*<sup>-/-</sup> (n =7) MCEnC in response to  
725 NH<sub>4</sub>Cl superfusion. Each individual data point is plotted as a dot. [Monte Carlo  
726 resampling two-tailed paired-sampled t-test, difference between genotype  $\Delta V_m = -$   
727 22.2 (-34.8, -10) mV, *p* = 0.0069]. (D) Heatmap showing common differentially  
728 expressed genes encoding ion channel and transporter proteins in *SLC4A11* KD  
729 pHCEnC and early and late *Slc4a11*<sup>-/-</sup> MCEnC. (E) The differential expression of  
730 Na<sup>+</sup>-HCO<sub>3</sub><sup>-</sup> transporter (NBCe1, encoded by *SLC4A4*) mRNA was validated by  
731 qPCR in separate RNA isolations from *SLC4A11* KD pHCEnC and *Slc4a11*<sup>-/-</sup>  
732 MCEnC. (F) Western Blot for NBCe1 in *SLC4A11* KD pHCEnC and scRNA pHCEnC  
733 control showing decreased NBCe1 protein level in *SLC4A11* KD pHCEnC. (G)  
734 Representative images of immunofluorescence staining for NBCe1 (green signal)  
735 and tight junction ZO-1 (red signal) in corneal endothelium of two individuals with  
736 CHED and healthy control. Nuclei were stained with DAPI (blue signal) (scale bar, 10  
737  $\mu$ m). (H) Scatterplot of mean fluorescence intensity (MFI) ratio of NBCe1 over ZO-1  
738 in corneal endothelium of two individuals with CHED and of seven healthy controls.  
739 (two-tailed unpaired t-test with Welch’s correction, *p* = 0.0031). (I) Representative  
740 trace of intracellular pH (pH<sub>i</sub>) response in *Slc4a11*<sup>-/-</sup> and *Slc4a11*<sup>+/+</sup> MCEnC to  
741 addition of extracellular Na<sup>+</sup> in HCO<sub>3</sub><sup>-</sup> containing solution. (J) Bar graph of the rate of

742 intracellular  $[H^+]$  change ( $d[H^+]/ds$ ) in *Slc4a11*<sup>+/+</sup> (n = 6) and *Slc4a11*<sup>-/-</sup> (n =8) MCEnC

743 (two tailed unpaired t-test,  $p < 0.0001$ ).

744

745 **Figure 4. Mitochondria dysfunction in SLC4A11 deficient corneal endothelium.**

746 (A) Heatmap of commonly enriched IPA canonical and biological function pathways  
747 in transcriptomes of *SLC4A11* KD pHCEnC, early and late *Slc4a11*<sup>-/-</sup> MCEnC without  
748 assigned activation z-scores (sorted by mean “adjusted p-value”). (B) Transcript  
749 levels of differentially expressed enzyme coding genes involved in mitochondria  
750 electron transport chain (Complex I: *NDUFA1*, *NDUFA9*, *NDUFA10*,  
751 NADH:Ubiquinone Oxidoreductase subunit A1, 9 and 10; *NDUFAB1*,  
752 NADH:Ubiquinone Oxidoreductase Subunit AB1; Complex II: SDHD, Succinate  
753 Dehydrogenase Complex Subunit D; Complex III: *UQCRB*, Ubiquinol-Cytochrome C  
754 Reductase Binding Protein; *UQCRC2*, Ubiquinol-Cytochrome C Reductase Core  
755 Protein 2; *CYC1*, Cytochrome C1; Complex IV: *COX5A*, *COX5B* and *COX7B*,  
756 Cytochrome C Oxidase Subunit 5A, 5B and 7B; Complex V: *ATP5F1*, ATP Synthase  
757 Peripheral Stalk-Membrane Subunit B; *ATP5G1*, ATP Synthase Membrane Subunit  
758 C Locus 1). (C) Transcript levels of differentially expressed protein coding genes that  
759 serve as mitochondrial functional markers (ATP flux: *VDAC2/3*, Voltage-dependent  
760 Anion-selective Channel; import machinery: *TIMM7A*, *TIMM8A*, *TIMM50*,  
761 Translocase of Inner Mitochondrial Membrane 7A, 8A, 50; translation machinery:  
762 *GFM2*, G Elongation Factor Mitochondrial 2; *MRPL10*, *MRPL18*, *MRPL20*, *MRPL33*,  
763 *MRPL48*, *MRPL52*, *MRPL58*, *MRPL16*, *MRPS2*, *MRPS18A*, Mitochondrial  
764 Ribosomal Protein L10, L18, L20, L33, L48, L52, L58, L16, S2, S18A;). (D)  
765 Transcript levels of differentially expressed *STX17* in *SLC4A11* KD pHCEnC and  
766 *Slc4a11*<sup>-/-</sup> MCEnC transcriptomes. (E) Differential expression of *STX17* mRNA in  
767 *SLC4A11* KD pHCEnC and *Slc4a11*<sup>-/-</sup> MCEnC validated by qPCR in separate RNA  
768 isolations. (F) Western Blot for *STX17* and NBCe1 in scRNA pHCEnC control and  
769 *SLC4A11* KD pHCEnC showing decreased protein level in *SLC4A11* KD pHCEnC.

770 (G) Representative images of immunofluorescence staining for STX17 (green signal)  
771 and mitochondria marker COX4 (red signal) in corneal endothelium of two individuals  
772 with CHED and healthy control. Nuclei were stained with DAPI (blue signal)(scale  
773 bar, 10  $\mu$ m). (H) Scatterplot of mean fluorescence intensity (MFI) ratio of STX17 over  
774 COX4 in corneal endothelium of two individuals with CHED and of seven healthy  
775 controls (two-tailed unpaired t-test with Welch's correction,  $p = 0.0483$ ). (I)  
776 Scatterplot of MFI of COX4 in corneal endothelium of two individuals with CHED and  
777 of seven healthy controls (two-tailed unpaired t-test with Welch's correction,  $p =$   
778 0.0018). (J) Representative images of immunofluorescence staining for cytochrome  
779 C (green signal) in corneal endothelium of two individuals with CHED and of seven  
780 healthy controls. Nucleus were stained with DAPI (blue signal) (scale bar, 5  $\mu$ m). (K)  
781 Scatterplot of MFI of cytochrome C in corneal endothelium of two individuals with  
782 CHED and of seven healthy controls (two-tailed unpaired t-test with Welch's  
783 correction,  $p = 0.0304$ ). (L) Bar graph summary of intracellular ATP levels measured in  
784 *SLC4A11* KD pHCEnC and scRNA pHCEnC controls (n = 6 each, one-tailed  
785 unpaired t-test,  $p = 0.0281$ ). (M) Bar graph summary of intracellular ATP levels  
786 measured in early passage (n=6 each, two-tailed unpaired t-test,  $p = 0.034$ ) and late  
787 passage (n=6 each,  $p = 0.039$ ) *Slc4a11*<sup>+/+</sup> and *Slc4a11*<sup>-/-</sup> MCEnC.  
788

789 **Figure 5. Activation of AMPK-p53 pathway in SLC4A11 deficient corneal**  
790 **endothelium.** (A) Heatmap of shared predicted upstream regulators of  
791 transcriptomes of SLC4A11 KD pHCEnC, early and late *Slc4a11*<sup>-/-</sup> MCEnC (sorted  
792 by mean “adjusted p-value”). (B) Western blot analysis of *SLC4A11* KD pHCEnC  
793 and scRNA controls for SLC4A11, Ser15 phosphorylated p53 (phos-p53 (S15)), total  
794 p53, Thr172 phosphorylated AMPK $\alpha$  (phos-AMPK $\alpha$  (T172)), total AMPK $\alpha$ , Ser182  
795 phosphorylated AMPK $\beta$  (phos-AMPK $\beta$ 1 (S182)) and total AMPK $\beta$ 1 and  $\beta$ 2. (C)  
796 Western blot analysis of early and late *Slc4a11*<sup>+/+</sup> and *Slc4a11*<sup>-/-</sup> MCEnC for Ser18  
797 phosphorylated p53 (phos-p53 (S18)), total p53, Thr172 phosphorylated AMPK $\alpha$   
798 (phos-AMPK $\alpha$  (T172)), total AMPK $\alpha$ , Ser182 phosphorylated AMPK $\beta$  (phos-  
799 AMPK $\beta$ 1 (S182)) and total AMPK $\beta$ 1 and  $\beta$ 2. (D) Bar graph summary of Western blot  
800 densitometry results for normalized total p53 level in *SLC4A11* KD pHCEnC versus  
801 scRNA pHCEnC (CTRL) (two-tailed unpaired-sample t-test,  $p > 0.99$ ), in early  
802 passage *Slc4a11*<sup>-/-</sup> versus *Slc4a11*<sup>+/+</sup> MCEnC ( $p = 0.00027$ ) and late passage  
803 *Slc4a11*<sup>-/-</sup> versus *Slc4a11*<sup>+/+</sup> MCEnC ( $p = 0.00027$ ).

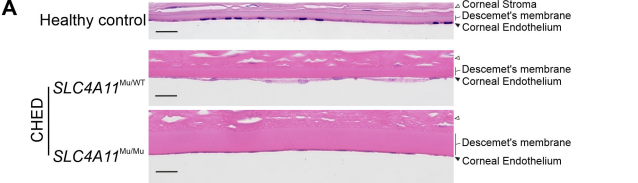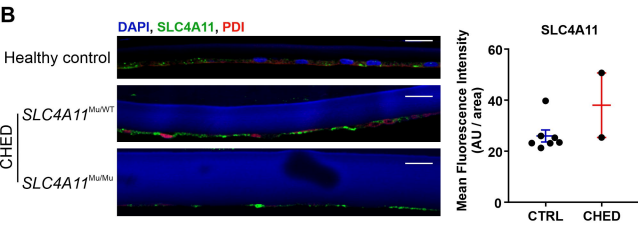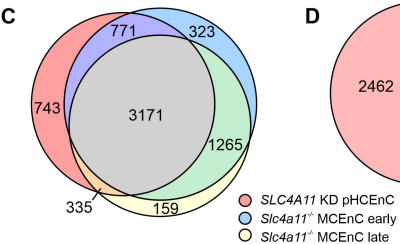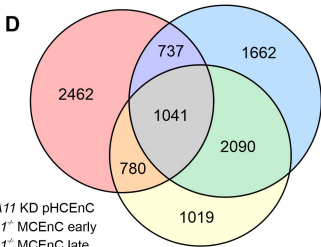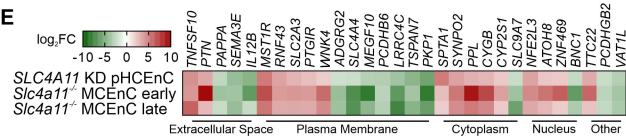

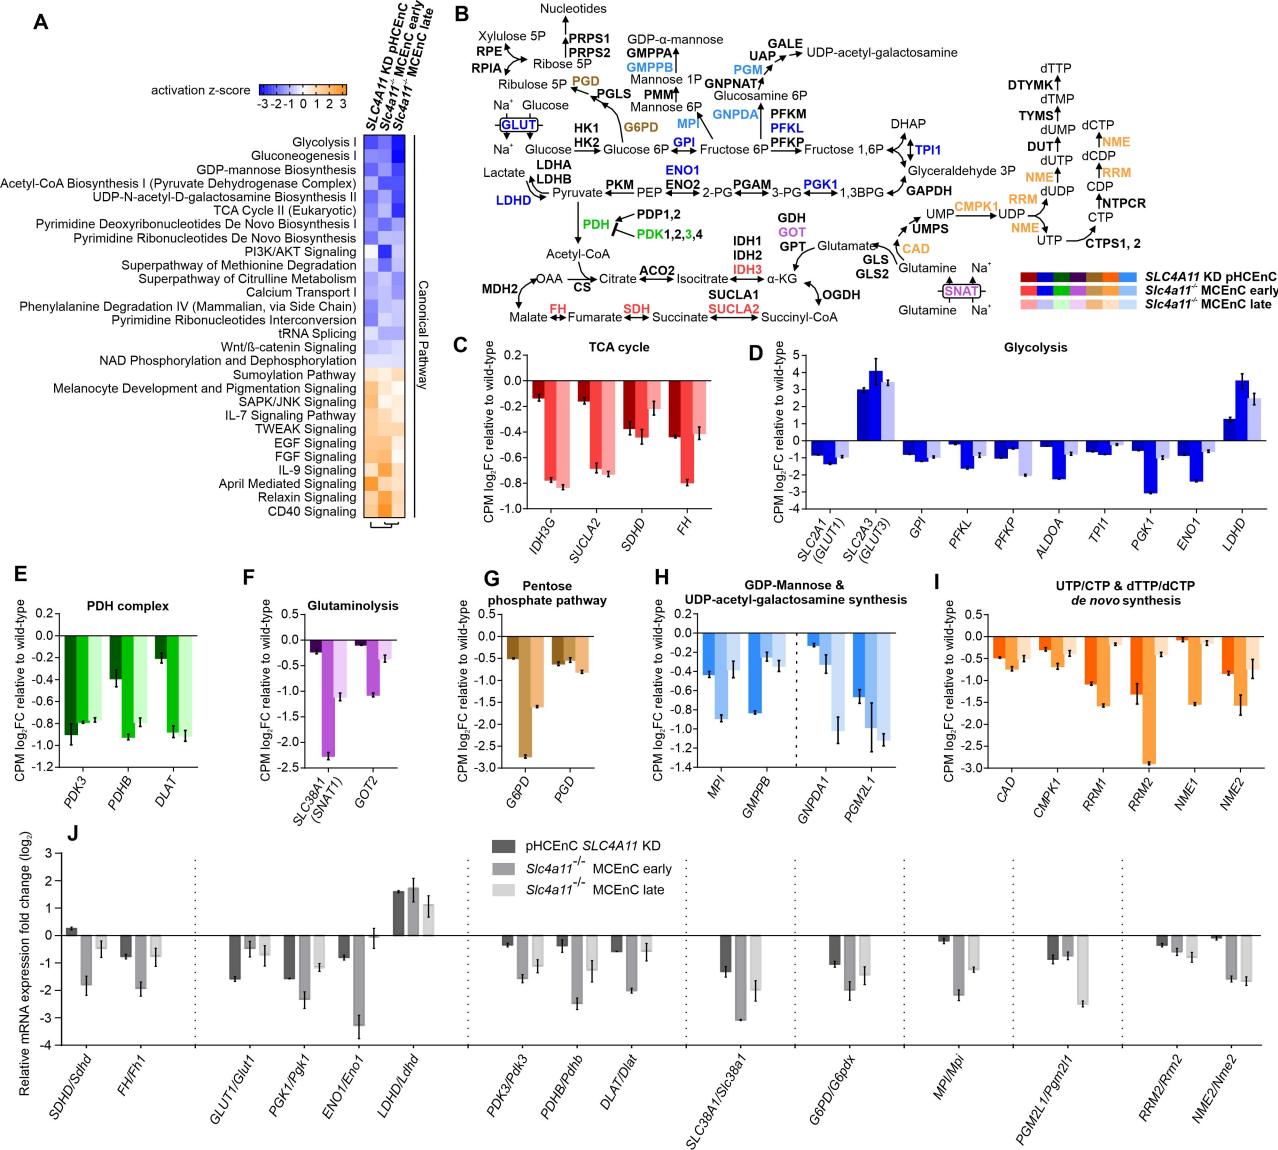

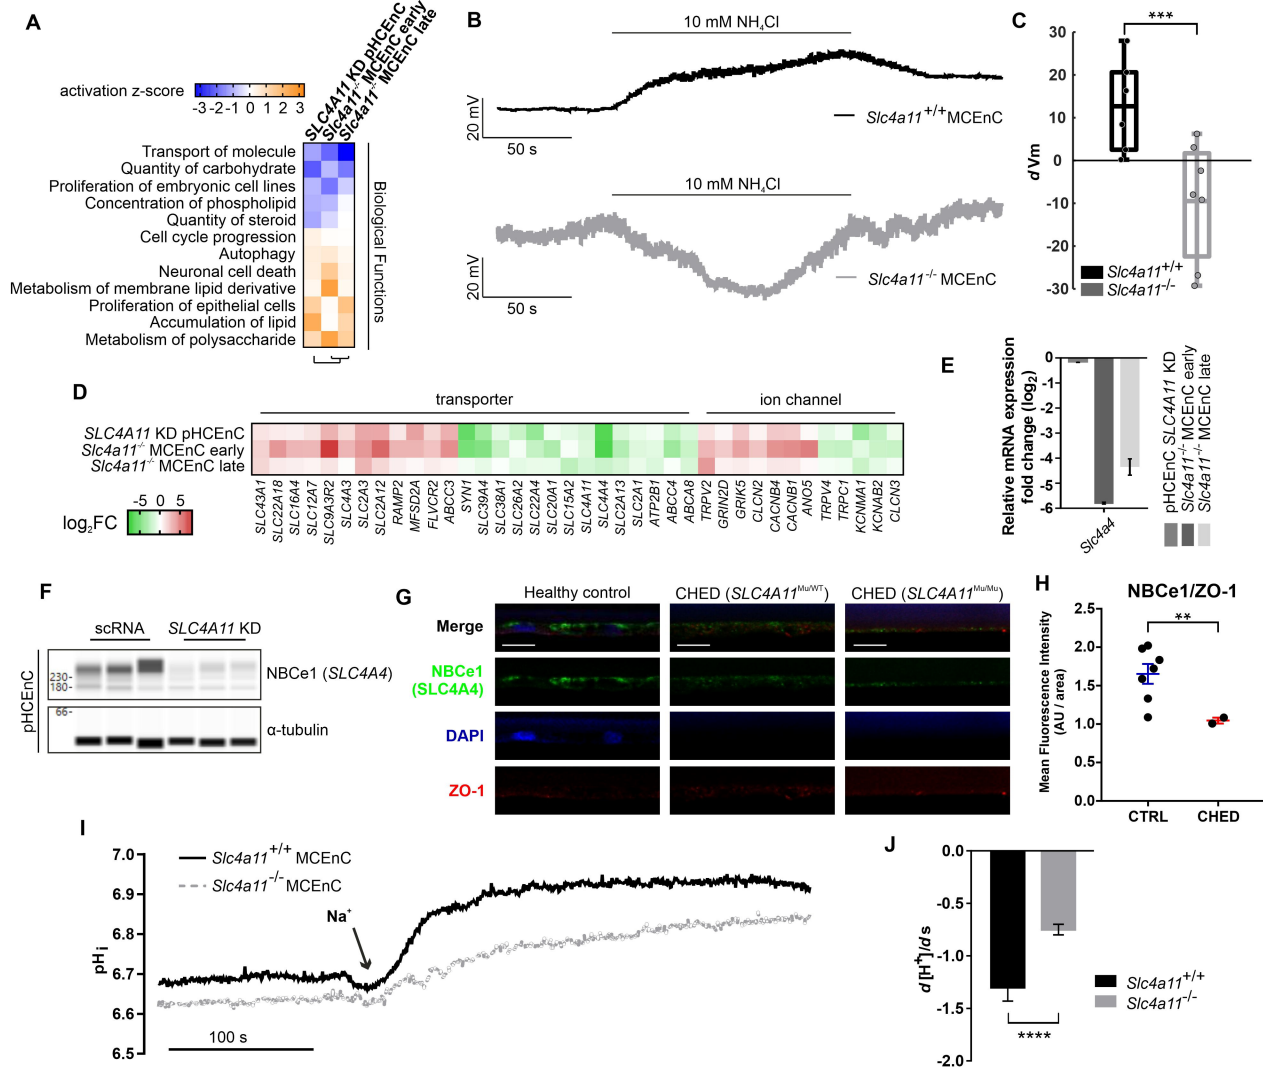



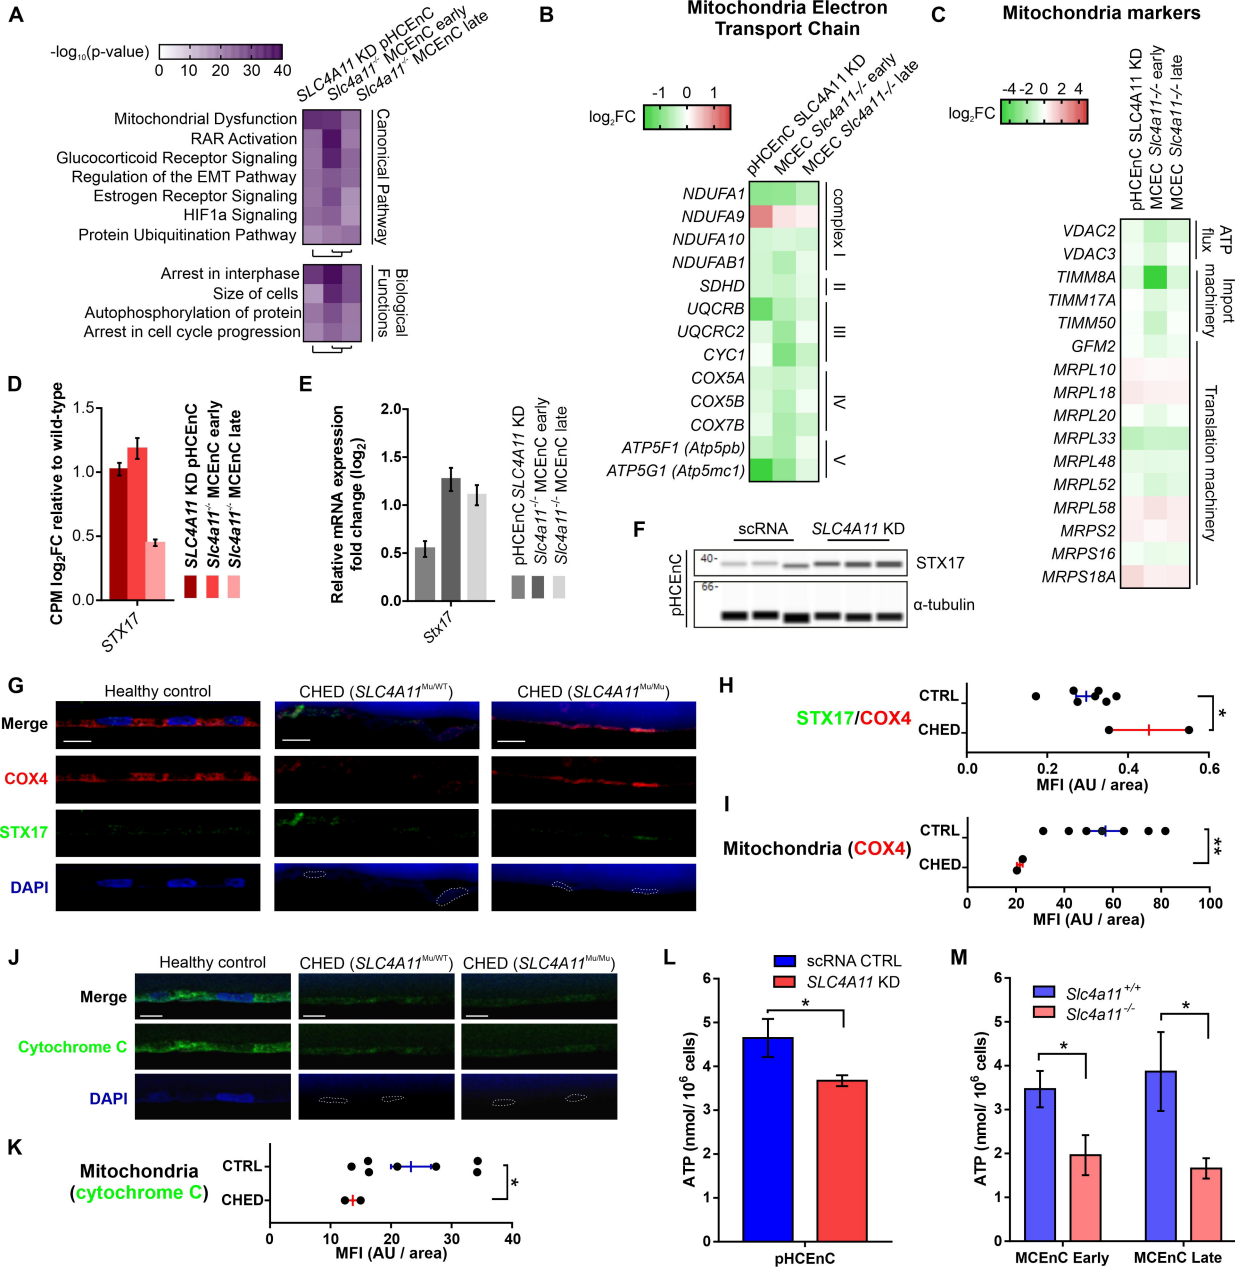

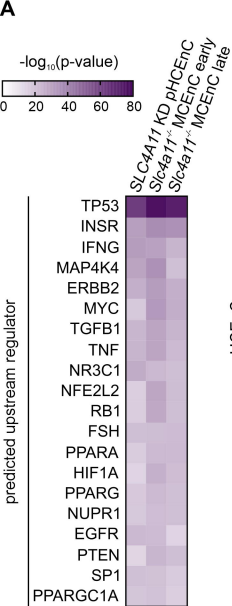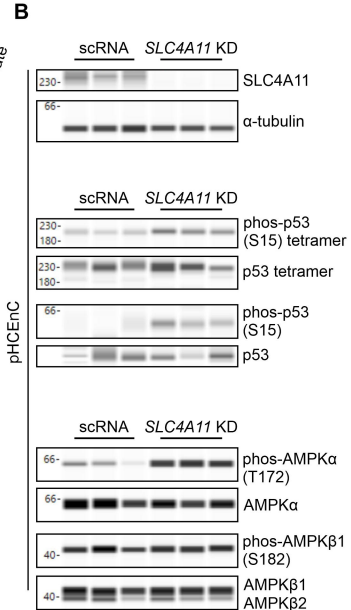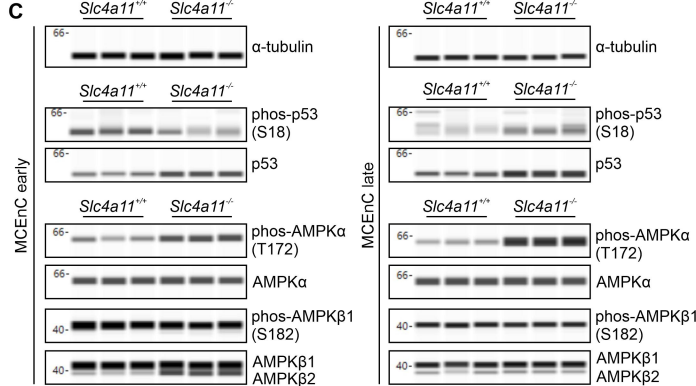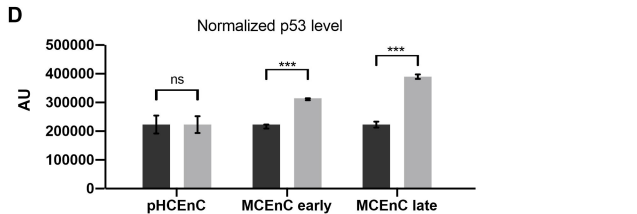

Source: https://biorxiv.org/content/biorxiv/early/2019/12/08/868281.full-text.pdf
